# Supplementary material
Source: publisher figshare collection journal article supplement (https://brill.figshare.com/ndownloader/files/36359109)
Supplement: Supplementary file 1 [file 36359109]

Species	USI	Gender	Width_of_head	Vertex_InterOcDi	AntSeg2_length	Pronotum_width	Pronotum_length	Hind_Tibia_length	Cun_clyp_length	AntSeg1_length	Heigth_of_head	Body_length	scutellum_length	scutellum_width	clavus_length_max	body_width_widest_part_of_hemelytron	hemelytron_forewings_length	corium_length	cuneus_length_middle
Lygus rugulipennis	AMNH_PBI 00347597	female	1.125	0.5	1.625	2.175	1.25	2.7	5.2	0.55	0.9	6.1	0.875	0.975	2.325	2.75	4.6	2.675	1.175
Lygus rugulipennis	AMNH_PBI 00347610	male	1.125	0.425	1.55	2.125	1.25	2.675	5	0.525	0.875	5.9	0.85	1	2.175	2.675	4.6	2.525	1.15
Lygus rugulipennis	AMNH_PBI 00347487	male	1.125	0.425	1.425	2.15	1.25	2.65	4.8	0.5	0.925	5.7	0.9	0.975	2.325	2.6	3.5	2.7	1.15
Lygus rugulipennis	AMNH_PBI 00347495	female	1.25	0.5	1.55	2.525	1.375	2.925	5.3	0.575	1.025	6.4	1.05	1.2	2.65	3.025	3.9	2.9	1.2
Lygus rugulipennis	AMNH_PBI 00348742	female	1.05	0.45	1.3	1.925	1.05	2.4	4.5	0.5	0.875	5.1	0.8	0.9	2.225	2.3	3.9	2.475	1.025
Lygus rugulipennis	AMNH_PBI 00348981	male	1.05	0.425	1.425	1.975	1.1	2.375	4.5	0.525	0.825	5.4	0.8	0.9	2.125	2.325	4.2	2.5	1.1
Lygus rugulipennis	ZISP_ENT 00000999	male	1.125	0.45	1.7	1.975	1.125	2.65	4.7	0.575	0.875	5.8	0.775	0.95	2.2	2.45	4.3	2.575	1.1
Lygus rugulipennis	ZISP_ENT 00000921	female	1.15	0.475	1.55	2.075	1.15	2.625	4.9	0.575	0.85	6	0.9	1	2.35	2.525	4.5	2.6	1.125
Lygus rugulipennis	AMNH_PBI 00349863	male	1.1	0.45	1.525	2	1.125	2.475	4.1	0.575	0.875	4.9	0.85	0.9	2.075	2.3	3.7	2.425	1.05
Lygus rugulipennis	AMNH_PBI 00349856	female	1.05	0.45	1.375	1.875	1.025	2.35	3.9	0.5	0.825	4.5	0.825	0.85	1.875	2.175	3.5	2.175	0.925
Lygus rugulipennis	AMNH_PBI 00349836	male	1.1	0.425	1.575	2.075	1.2	2.7	4.6	0.55	0.875	5.6	0.925	0.975	2.35	2.55	4.3	2.575	1.15
Lygus rugulipennis	AMNH_PBI 00344554	female	1.125	0.45	1.475	2.175	1.225	2.6	4.5	0.55	0.925	5.3	0.95	1.025	2.25	2.65	3.8	2.575	1.125
Lygus rugulipennis	AMNH_PBI 00339475	female	1.075	0.475	1.325	2.075	1.175	2.4	4.6	0.525	0.9	5.5	0.85	0.95	2.2	2.5	4.1	2.55	1.1
Lygus rugulipennis	AMNH_PBI 00339481	male	1.05	0.425	1.35	1.9	1.05	2.3	4.5	0.45	0.85	5.4	0.8	0.925	2.15	2.275	4.2	2.45	1.1
Lygus rugulipennis	AMNH_PBI 00339654	female	1.125	0.45	1.4	2.1	1.2	2.55	4.5	0.5	0.95	5.1	0.9	1	2.35	2.575	3.9	2.625	1.1
Lygus rugulipennis	AMNH_PBI 00339674	male	1.125	0.45	1.55	2.05	1.15	2.575	4.4	0.525	0.9	5.2	0.85	0.925	2.075	2.4	4	2.4	1.075
Lygus rugulipennis	AMNH_PBI 00339283	female	1.175	0.5	1.525	2.15	1.275	2.65	4.9	0.5	0.925	5.8	0.9	2.175	2.375	2.625	4.4	2.675	1.15
Lygus rugulipennis	AMNH_PBI 00339327	male	1.1	0.425	1.45	1.975	1.15	2.55	4.2	0.6	0.875	5	0.825	0.9	2.1	2.4	3.9	2.425	1.1
Lygus rugulipennis	AMNH_PBI 00339207	male	1.125	0.425	1.575	2.1	1.225	2.625	4.8	0.55	0.9	5.8	0.85	0.975	2.225	2.475	4.4	2.625	1.15
Lygus rugulipennis	AMNH_PBI 00339216	female	1.1	0.475	1.4	2.05	1.175	2.525	4.4	0.525	0.9	5.2	0.875	0.95	2.225	2.475	4	2.475	1.075
Lygus rugulipennis	AMNH_PBI 00347189	male	1.05	0.425	1.55	1.925	1.1	2.5	4.4	0.5	0.825	5.3	0.825	0.85	2.075	2.3	4	2.35	1.05
Lygus rugulipennis	AMNH_PBI 00347190	female	1.15	0.475	1.575	2.175	1.225	2.55	4.8	0.55	0.925	5.6	0.95	1	2.25	2.575	4.1	2.5	1.025
Lygus rugulipennis	AMNH_PBI 00338968	male	1.15	0.45	1.475	2.175	1.2	2.45	4.7	0.525	0.875	5.8	0.875	1	2.3	2.525	4.3	2.575	1.15
Lygus rugulipennis	AMNH_PBI 00338981	female	1.15	0.475	1.3	2.175	1.2	2.425	4.8	0.525	0.9	5.7	0.925	1	2.425	2.6	4.4	2.65	1.125
Lygus rugulipennis	AMNH_PBI 00345543	male	1.075	0.425	1.675	2.05	1.175	2.55	4.3	0.575	0.9	5.2	0.875	0.95	2.175	2.35	4.1	2.525	1.125
Lygus rugulipennis	AMNH_PBI 00339710	female	1.125	0.475	1.5	2.15	1.2	2.7	4.7	0.5	0.95	5.5	0.925	0.975	2.45	2.575	4.2	2.625	1.05
Lygus rugulipennis	AMNH_PBI 00345413	male	1.15	0.425	1.55	2.125	1.2	2.65	4.7	0.5	0.925	5.4	0.9	1	2.425	2.45	4.2	2.6	1.15
Lygus rugulipennis	AMNH_PBI 00345583	female	1.15	0.475	1.5	2.125	1.175	2.7	4.7	0.525	0.925	5.5	0.925	0.975	2.3	2.5	4.1	2.525	1.175
Lygus rugulipennis	AMNH_PBI 00345391	female	1.125	0.475	1.45	2.1	1.175	2.525	4.9	0.525	0.875	5.9	0.825	0.95	2.35	2.6	4.5	2.575	1.075
Lygus rugulipennis	AMNH_PBI 00345387	male	1.1	0.425	1.45	1.95	1.1	2.425	4.5	0.5	0.9	5.2	0.8	0.925	2.275	2.325	4	2.5	1
Lygus rugulipennis	AMNH_PBI 00339535	male	1.075	0.425	1.475	2	1.125	2.55	4.7	0.5	0.875	5.7	0.85	0.95	2.325	2.425	4.5	2.55	1.125
Lygus rugulipennis	AMNH_PBI 00339564	female	1.125	0.475	1.5	2.05	1.125	2.625	4.6	0.55	0.95	5.5	0.85	0.925	2.25	2.425	4.2	2.55	1.1
Lygus rugulipennis	AMNH_PBI 00345366	male	1.1	0.45	1.475	1.95	1.125	2.525	4.5	0.5	0.85	5.2	0.8	0.875	2.075	2.3	4	2.425	1.075
Lygus rugulipennis	AMNH_PBI 00345652	female	1.15	0.5	1.35	2.075	1.2	2.525	4.9	0.5	0.95	5.8	0.875	0.95	2.25	2.525	4.3	2.725	1.1
Lygus rugulipennis	AMNH_PBI 00345271	male	1.1	0.4	1.55	1.925	1.05	2.55	4.4	0.5	0.85	5.1	0.85	0.875	2.175	2.325	3.9	2.425	1.05
Lygus rugulipennis	AMNH_PBI 00345270	female	1.15	0.5	1.4	2.15	1.275	2.6	4.9	0.525	0.9	5.7	0.925	0.975	2.375	2.575	4.3	2.7	1.125
Lygus rugulipennis	AMNH_PBI 00343789	male	1.125	0.45	1.575	2.1	1.15	2.6	4.6	0.55	0.85	5.5	0.9	0.95	2.175	2.5	4.3	2.425	1.05
Lygus rugulipennis	AMNH_PBI 00345256	female	1.15	0.45	1.475	2.075	1.2	2.55	4.7	0.55	0.9	5.6	0.875	0.95	2.25	2.575	4.3	2.575	1.05
Lygus rugulipennis	AMNH_PBI 00339429	female	1.175	0.5	1.625	2.375	1.225	2.775	4.9	0.55	0.95	5.8	0.925	1.025	2.3	2.775	4.5	2.7	1.175
Lygus rugulipennis	AMNH_PBI 00339267	male	1.15	0.45	1.55	2.15	1.225	2.675	4.9	0.55	0.9	5.7	0.85	0.95	2.35	2.6	4.4	2.725	1.1
Lygus wagneri	AMNH_PBI 00344975	male	1.15	0.425	1.65	2.175	1.25	2.8	5.2	0.625	0.85	6	0.85	1.025	2.475	2.925	4.6	2.725	1.25
Lygus wagneri	AMNH_PBI 00344979	female	1.15	0.475	1.625	2.3	1.25	2.775	4.8	0.575	1	5.5	0.925	1.075	2.7	2.8	4.5	2.975	1.175
Lygus wagneri	AMNH_PBI 00348958	male	1.175	0.475	1.775	2.3	1.275	2.775	5	0.6	1	5.9	0.875	1.125	2.4	2.9	4.5	2.65	1.15
Lygus wagneri	AMNH_PBI 00344982	female	1.175	0.5	1.65	2.325	1.275	2.8	5.2	0.6	0.975	6.2	0.825	1.025	2.5	2.9	4.9	2.875	1.2
Lygus wagneri	AMNH_PBI 00350160	female	1.175	0.5	1.575	2.325	1.325	2.9	5.4	0.575	0.95	6.3	0.925	1.1	2.5	2.85	4.7	2.875	1.225
Lygus wagneri	AMNH_PBI 00343653	male	1.2	0.5	1.775	2.35	1.4	2.8	5.2	0.625	1.025	6	0.875	1.1	2.5	2.875	4.9	2.875	1.25
Lygus wagneri	AMNH_PBI 00343584	female	1.175	0.5	1.6	2.5	1.15	2.7	4.9	0.575	0.975	6	0.85	1.075	2.55	2.8	4.9	2.825	1.2
Lygus wagneri	AMNH_PBI 00343580	male	1.15	0.45	1.625	2.125	1.15	2.725	5.3	0.575	0.95	6.4	0.9	1.05	2.525	2.925	5.3	2.875	1.325
Lygus wagneri	AMNH_PBI 00343577	female	1.15	0.5	1.5	2.3	1.275	2.675	4.7	0.575	0.95	5.3	0.875	1.025	2.425	2.8	4.1	2.6	1.2
Lygus wagneri	AMNH_PBI 00343590	female	1.15	0.5	1.525	2.125	1.175	2.7	4.8	0.55	0.925	5.7	0.9	0.975	2.4	2.875	4.6	2.725	1.15
Lygus wagneri	AMNH_PBI 00343593	female	1.225	0.525	1.55	2.3	1.3	2.65	5.1	0.575	0.975	6	0.95	1.05	2.475	3	4.7	2.75	1.25
Lygus wagneri	AMNH_PBI 00343597	male	1.15	0.45	1.7	2.225	1.275	2.85	5.4	0.6	0.9	6.5	0.925	1.1	2.5	2.8	5	2.875	1.275
Lygus wagneri	AMNH_PBI 00343596	female	1.2	0.5	1.65	2.175	1.225	2.85	5.2	0.575	0.925	5.9	0.875	1.1	2.55	2.975	4.5	2.9	1.15
Lygus wagneri	AMNH_PBI 00348969	female	1.125	0.475	1.525	2.175	1.25	2.625	5	0.55	0.875	5.8	0.825	1	2.4	2.75	4.4	2.675	1.175
Lygus wagneri	ZISP_ENT 00000946	male	1.1	0.45	1.6	2.175	1.25	2.8	5.2	0.625	0.9	6.1	0.925	1	2.65	2.8	4.9	2.95	1.325
Lygus wagneri	AMNH_PBI 00348941	male	1.1	0.425	1.8	2.3	1.3	2.75	5.6	0.575	0.925	6.8	0.975	1.05	2.7	2.95	5.5	2.95	1.425
Lygus wagneri	AMNH_PBI 00344812	female	1.175	0.525	1.575	2.275	1.05	2.725	5.1	0.625	0.975	6	0.925	1.05	2.475	2.725	4.7	2.75	1.225
Lygus wagneri	AMNH_PBI 00344822	male	1.1	0.45	1.675	2.175	1.05	2.725	5	0.6	0.95	5.9	0.8	0.95	2.35	2.75	4.5	2.625	1.275
Lygus wagneri	AMNH_PBI 00348941	male	1.1	0.425	1.775	2.275	1.15	2.7	5.5	0.55	0.95	6.7	0.95	1.05	2.575	2.9	5.2	2.925	1.425
Lygus wagneri	AMNH_PBI 00348943	female	1.175	0.475	1.6	2.375	1.125	2.825	5.1	0.575	1	6.2	0.975	1.1	2.5	2.775	4.9	2.95	1.275
Lygus wagneri	AMNH_PBI 00344831	male	1.125	0.425	1.7	2.2	1.15	2.925	5.4	0.575	0.925	6.3	0.925	1.025	2.475	2.85	4.9	2.85	1.375
Lygus wagneri	AMNH_PBI 00344837	female	1.175	0.5	1.6	2.35	1.2	2.8	5.1	0.6	1	6.1	0.95	1.1	2.475	3	4.7	2.775	1.325
Lygus wagneri	AMNH_PBI 00349181	female	1.15	0.5	1.575	2.325	1.15	2.85	4.9	0.575	1	5.8	0.9	1.125	2.5	2.825	4.4	2.775	1.225
Lygus wagneri	AMNH_PBI 00349182	male	1.1	0.45	1.65	2.175	1.1	2.775	4.9	0.525	0.925	5.7	0.875	1.025	2.425	2.75	4.5	2.7	1.275
Lygus wagneri	AMNH_PBI 00349188	female	1.175	0.5	1.625	2.375	1.2	2.9	5.2	0.6	0.975	6.1	1	1.2	2.525	3	4.6	2.775	1.3
Lygus wagneri	AMNH_PBI 00349189	male	1.1	0.425	1.725	2.275	1.025	2.825	5.3	0.6	0.95	6.4	0.975	1.05	2.475	2.75	4.9	2.8	1.275
Lygus wagneri	AMNH_PBI 00343612	female	1.15	0.5	1.5	2.325	1.15	2.775	5.1	0.525	0.975	6	0.85	1.075	2.375	2.9	4.4	2.55	0.7
Lygus wagneri	AMNH_PBI 00344847	male	1.075	0.425	1.55	2.05	1.025	2.65	4.9	0.575	0.9	5.8	0.9	0.95	2.475	2.6	4.6	2.75	1.325
Lygus wagneri	AMNH_PBI 00350155	male	1.125	0.45	1.725	2.175	1.075	2.775	5.1	0.575	0.95	6.4	0.95	1.025	2.525	2.75	4.9	2.8	1.25
Lygus wagneri	AMNH_PBI 00349249	female	1.2	0.5	1.675	2.45	1.2	2.95	5.6	0.625	1	6.5	1	1.15	2.625	2.875	5.1	2.925	1.325
Lygus wagneri	AMNH_PBI 00345960	female	1.2	0.5	1.725	2.4	1.125	3.025	5.3	0.625	1.025	6.1	0.95	1.1	2.575	2.9	4.6	2.875	1.25
Lygus wagneri	AMNH_PBI 00350167	male	1.175	0.45	1.775	2.325	1.175	2.9	5.5	0.6	0.975	6.5	0.95	1.1	2.525	2.975	5.1	2.875	1.4
Lygus wagneri	AMNH_PBI 00348963	male	1.175	0.425	1.625	2.25	1.075	2.875	4.8	0.575	0.975	5.8	0.925	1.025	2.45	2.75	4.4	2.775	1.225
Lygus wagneri	AMNH_PBI 00348968	female	1.075	0.45	1.3	2.15	1.075	2.425	4.7	0.475	0.925	5.9	0.9	0.95	2.275	2.75	4.2	2.45	1.125
Lygus wagneri	AMNH_PBI 00348966	female	1.15	0.475	1.65	2.35	1.175	2.725	5.2	0.625	0.975	6.2	0.875	1.025	2.575	2.8	4.8	2.85	1.3
Lygus wagneri	AMNH_PBI 00343606	male	1.1	0.425	1.475	2.175	1.075	2.675	5.1	0.55	0.95	6.1	0.825	0.975	2.375	2.775	4.8	2.725	1.275
Lygus wagneri	AMNH_PBI 00349251	male	1.125	0.425	1.7	2.15	1.075	2.925	5.2	0.675	0.925	6.4	0.925	1.025	2.5	2.775	5	2.75	1.375
Lygus wagneri	AMNH_PBI 00344896	female	1.2	0.525	1.75	2.475	1.2	3	5.4	0.65	1	6.3	0.975	1.2	2.7	3.025	4.8	2.975	1.375
Lygus wagneri	AMNH_PBI 00348962	male	1.125	0.425	1.7	2.15	1.125	2.775	4.9	0.575	0.925	5.9	0.925	1.025	2.45	2.65	4.7	2.775	1.275
Lygus wagneri	AMNH_PBI 00344867	female	1.2	0.5	1.725	2.4	1.15	2.9	5.2	0.65	1	6.2	0.95	1.125	2.55	3	4.6	2.775	1.325
Lygus wagneri	AMNH_PBI 00348956	male	1.15	0.425	1.675	2.2	1.075	2.875	5.2	0.625	0.95	6.1	0.95	1.075	2.65	2.9	4.8	2.875	1.425
Lygus punctatus	AMNH_PBI 00345930	male	1.15	0.425	2	2.325	1.375	3.025	5.6	0.675	0.925	6.3	1	1.1	2.6	3.05	4.7	2.95	1.5
Lygus punctatus	AMNH_PBI 00346106	male	1.2	0.475	1.7	2.425	1.425	2.925	5.3	0.625	0.95	6.5	1	1.15	2.525	2.775	5.1	3.05	1.25
Lygus punctatus	AMNH_PBI 00350169	male	1.15	0.45	1.825	2.275	1.3	3	5.5	0.65	0.9	6.6	1	1.05	2.75	2.875	5.5	2.875	1.475
Lygus punctatus	AMNH_PBI 00350172	male	1.2	0.45	1.9	2.375	1.425	3.15	5.6	0.675	0.925	6.9	1.05	1.125	2.65	3.1	5.5	3	1.5
Lygus punctatus	AMNH_PBI 00346053	male	1.175	0.5	1.65	2.425	1.375	2.8	4.7	0.575	0.975	5.9	1.025	1.15	2.575	2.85	5	2.875	1.325
Lygus punctatus	AMNH_PBI 00345921	female	1.15	0.475	1.8	2.325	1.375	2.875	5	0.6	0.925	6.1	0.95	1.05	2.425	2.825	4.6	2.75	1.2
Lygus punctatus	AMNH_PBI 00350177	female	1.2	0.5	1.7	2.425	1.425	3.075	5.3	0.65	0.975	6	0.95	1.1	2.6	3.15	4.6	2.85	1.325
Lygus punctatus	AMNH_PBI 00339962	female	1.175	0.5	1.825	2.325	1.375	2.975	5.5	0.65	0.95	6.3	0.9	1.1	2.45	3	4.7	2.825	1.325
Lygus punctatus	AMNH_PBI 00345928	female	1.175	0.5	1.675	2.425	1.4	2.85	5.2	0.6	0.95	6.1	0.95	1.15	2.6	2.975	4.7	2.875	1.3
Lygus punctatus	AMNH_PBI 00345955	female	1.175	0.475	1.775	2.45	1.45	2.925	5.6	0.675	0.975	6.5	1	1.15	2.6	3.05	5	2.875	1.325
Lygus punctatus	AMNH_PBI 00346039	female	1.25	0.55	1.775	2.6	1.55	2.95	5.3	0.65	1	6.3	1.05	1.275	2.7	3.05	4.9	3	1.275
Lygus punctatus	AMNH_PBI 00345920	female	1.2	0.475	1.75	2.425	1.4	2.95	5	0.625	0.95	5.9	1	1.125	2.575	2.975	4.7	2.875	1.325
Lygus punctatus	AMNH_PBI 00345936	female	1.125	0.475	1.625	2.325	1.225	2.8	5.1	0.6	0.975	6	0.875	1.025	2.625	2.875	4.7	2.775	1.225
Lygus punctatus	AMNH_PBI 00345947	female	1.15	0.475	1.775	2.45	1.4	2.95	5.5	0.65	1	6.5	0.925	1.075	2.5	3.125	4.9	2.9	1.35
Lygus punctatus	AMNH_PBI 00345939	male	1.125	0.425	1.95	2.35	1.375	3.025	5.5	0.65	0.925	6.9	0.975	1.075	2.725	3.1	5.4	3.05	1.475
Lygus punctatus	AMNH_PBI 00345943	male	1.15	0.45	1.95	2.4	1.45	3.2	5.9	0.65	0.95	7.2	0.9	1.125	2.65	3.075	5.6	3.15	1.525
Lygus punctatus	AMNH_PBI 00345964	male	1.125	0.45	1.775	2.275	1.2	2.9	5.4	0.675	0.95	6.7	0.9	1.075	2.5	2.925	5.2	2.775	1.4
Lygus punctatus	AMNH_PBI 00346009	male	1.2	0.5	1.725	2.55	1.525	2.975	5.5	0.525	1	6.2	1.05	1.225	2.7	3.05	4.6	3.025	1.225
Lygus punctatus	AMNH_PBI 00345973	male	1.175	0.475	1.675	2.375	1.375	2.725	5.3	0.6	0.975	6.2	0.925	1.125	2.5	2.825	4.8	2.875	1.25
Lygus punctatus	AMNH_PBI 00349234	male	1.125	0.475	1.6	2.325	1.175	2.775	5.3	0.625	0.95	6.2	0.975	1.1	2.525	2.975	4.8	2.875	1.275
Lygus punctatus	AMNH_PBI 00346051	male	1.15	0.475	1.65	2.35	1.2	2.775	5.3	0.625	0.975	6.4	0.95	1.125	2.375	2.675	4.9	2.625	1.225
Lygus punctatus	AMNH_PBI 00346037	female	1.15	0.5	1.575	2.45	1.2	2.725	4.9	0.675	1	5.7	0.975	1.15	2.575	2.925	4.5	2.825	1.2
Lygus punctatus	AMNH_PBI 00344863	male	1.15	0.475	1.5	2.325	1.175	2.625	5	0.55	0.975	5.9	1	1.075	2.375	2.775	4.5	2.625	1.2
Lygus punctatus	AMNH_PBI 00348721	female	1.1	0.45	1.55	2.075	1	2.6	4.5	0.625	0.9	5.1	0.825	0.975	2.1	2.55	3.7	2.375	1.175
Lygus punctatus	AMNH_PBI 00346049	male	1.175	0.5	1.75	2.425	1.25	2.95	5.2	0.675	0.95	6.2	0.975	1.15	2.525	2.875	4.9	2.625	1.275
Lygus punctatus	AMNH_PBI 00344851	female	1.25	0.525	1.7	2.575	1.275	3.025	5.5	0.65	1	6.6	1.05	1.275	2.75	3.025	5.1	2.975	1.275
Lygus punctatus	AMNH_PBI 00344858	male	1.125	0.475	1.55	2.4	1.225	2.6	5.1	0.55	0.925	6	0.975	1.125	2.45	2.925	4.7	2.7	1.25
Lygus punctatus	AMNH_PBI 00344856	female	1.2	0.5	1.65	2.375	1.3	2.825	5.3	0.625	0.95	6	1	1.175	2.575	2.85	4.5	2.8	1.3
Lygus punctatus	AMNH_PBI 00345974	male	1.125	0.45	1.675	2.325	1.175	2.825	5.2	0.6	0.95	6.3	0.875	1.075	2.425	2.75	4.8	2.675	1.15
Lygus punctatus	AMNH_PBI 00345968	female	1.175	0.525	1.7	2.5	1.25	2.9	5.3	0.55	1.025	6.3	1.025	1.225	2.525	3.05	4.8	2.8	1.225
Lygus punctatus	AMNH_PBI 00346006	female	1.2	0.55	1.725	2.5	1.275	2.975	5.3	0.65	1	6.5	1	1.2	2.625	2.925	5	2.925	1.2
Lygus punctatus	AMNH_PBI 00346011	male	1.175	0.475	1.7	2.45	1.25	2.9	5.3	0.625	0.975	6.2	1.025	1.175	2.5	2.85	4.6	2.75	1.25
Lygus punctatus	AMNH_PBI 00349196	male	1.125	0.475	1.65	2.4	1.25	2.775	5.2	0.575	0.925	6.3	0.95	1.15	2.525	3	4.8	2.75	1.225
Lygus punctatus	AMNH_PBI 00346021	male	1.2	0.5	1.875	2.5	1.3	3.025	5.6	0.675	1	6.7	1.05	1.25	2.575	3	5.3	2.875	1.325
Lygus punctatus	AMNH_PBI 00346026	female	1.2	0.525	1.7	2.55	1.325	2.925	5.5	0.675	1	6.4	1.05	1.25	2.775	3.025	4.9	2.95	1.375
Lygus punctatus	AMNH_PBI 00345959	female	1.125	0.5	1.75	2.275	1.15	2.85	5.1	0.625	0.975	6	0.875	1.05	2.475	2.9	4.7	2.65	1.275
Lygus punctatus	AMNH_PBI 00349199	female	1.175	0.525	1.7	2.6	1.35	2.975	5.7	0.65	1	6.7	1.025	1.25	2.6	3.175	5	2.85	1.25
Lygus punctatus	AMNH_PBI 00345954	female	1.15	0.5	1.675	2.35	1.225	2.825	4.6	0.6	0.925	5.5	0.9	1.1	2.45	2.85	4.5	2.75	1.35
Lygus punctatus	AMNH_PBI 00344164	male	1.15	0.475	1.625	2.275	1.15	2.75	5	0.575	0.925	5.9	0.925	1.1	2.525	2.625	4.5	2.75	1.225
Lygus punctatus	AMNH_PBI 00347691	male	1.15	0.45	1.85	2.3	1.15	3.075	5.7	0.675	0.95	7	0.975	1.075	2.65	3	5.6	2.875	1.475
Lygus punctatus	ZISP_ENT 00000952	female	1.125	0.5	1.7	2.175	1.15	2.8	5.5	0.6	0.95	6.5	0.9	1.05	2.4	2.7	4.9	2.675	1.25
Lygus pratensis	AMNH_PBI 00349132	male	1.15	0.45	1.725	2.2	1.2	2.85	5.4	0.525	0.85	6.6	0.95	1.05	2.55	2.8	5.2	2.825	1.4
Lygus pratensis	AMNH_PBI 00349137	female	1.2	0.475	1.6	2.375	1.15	2.775	5.1	0.575	0.9125	6	0.975	1.125	2.55	2.85	4.4	2.85	1.275
Lygus pratensis	AMNH_PBI 00346813	male	1.05	0.4	1.575	2	1.1	2.675	4.85	0.5	0.875	6	0.875	0.95	2.3	2.525	4.6	2.55	1.25
Lygus pratensis	AMNH_PBI 00346812	female	1.1	0.45	1.575	2.125	1.15	2.675	4.7	0.5	0.925	5.5	0.875	1	2.275	2.55	4.2	2.3	1.125
Lygus pratensis	AMNH_PBI 00346848	male	1.05	0.4	1.55	1.8	1.05	2.475	4.3	0.525	0.85	5.1	0.85	0.9	2.125	2.2	3.9	2.325	1.1
Lygus pratensis	AMNH_PBI 00346842	female	1.15	0.475	1.4	2.125	1.075	2.55	4.45	0.525	0.875	5.1	0.875	1.075	2.25	2.6	4	2.5	1.15
Lygus pratensis	AMNH_PBI 00345013	male	1.125	0.425	1.625	2.275	1.2	2.95	5.6	0.55	0.85	7	0.875	1.075	2.55	2.85	5.5	2.8	1.375
Lygus pratensis	AMNH_PBI 00345012	female	1.1	0.45	1.425	2.175	1.15	2.5	4.8	0.5	0.9	5.8	0.875	1.05	2.175	2.55	4.4	2.45	1.125
Lygus pratensis	AMNH_PBI 00339734	male	1.125	0.425	1.525	2.15	1.075	2.5	4.65	0.5	0.85	5.6	0.875	1	2.3	2.55	4.3	2.425	1.125
Lygus pratensis	AMNH_PBI 00339738	female	1.125	0.475	1.5	2.125	1.075	2.5	4.65	0.475	0.875	5.6	0.8625	1	2.275	2.575	4.2	2.5	1.075
Lygus pratensis	AMNH_PBI 00348304	male	1.15	0.4	1.5	2.15	1.1	2.825	5.1	0.575	0.925	6.3	0.875	1	2.25	2.575	5	2.6	1.35
Lygus pratensis	AMNH_PBI 00348307	female	1.15	0.475	1.525	2.375	1.1875	2.9	5	0.5	0.875	5.9	0.9875	1.075	2.4	2.675	4.5	2.6	1.225
Lygus pratensis	AMNH_PBI 00338540	female	1.125	0.475	1.4	2.275	1.2125	2.65	4.85	0.525	0.9	5.9	0.875	1.05	2.25	2.65	4.45	2.5	1.1
Lygus pratensis	AMNH_PBI 00338549	male	1.075	0.4	1.55	2.125	1.1	2.625	4.95	0.55	0.875	6.2	0.8375	0.95	2.175	2.5	4.8	2.325	1.225
Lygus pratensis	AMNH_PBI 00339725	male	1.125	0.375	1.625	2.025	1.075	2.6	4.9	0.55	0.825	6.1	0.8	0.925	2.15	2.275	4.6	2.45	1.225
Lygus pratensis	AMNH_PBI 00339729	female	1.1	0.425	1.5	2.175	1.125	2.625	4.8	0.55	0.9	5.7	0.9	1.025	2.175	2.575	4.2	2.425	1.075
Lygus pratensis	AMNH_PBI 00339797	female	1.125	0.45	1.525	2.15	1.15	2.6	4.9	0.475	0.9	5.7	0.85	1.025	2.325	2.525	4.2	2.5	1.175
Lygus pratensis	AMNH_PBI 00339798	male	1.15	0.425	1.725	2.15	1.175	2.95	5.2	0.6	0.925	6.3	0.875	1.025	2.35	2.575	4.8	2.6	1.175
Lygus pratensis	AMNH_PBI 00348340	female	1.25	0.5	1.625	2.525	1.3	2.9	5.7	0.6	1	6.6	0.95	1.2	2.5	3.05	4.8	2.775	1.3
Lygus pratensis	AMNH_PBI 00348341	male	1.15	0.425	1.625	2.225	1.15	2.7	5.4	0.6	0.875	6.7	0.9	1.025	2.5	2.65	5.1	2.7	1.325
Lygus pratensis	AMNH_PBI 00346899	male	1.15	0.425	1.625	2.275	1.125	2.7	5.1	0.575	0.875	6.1	0.925	1.075	2.5	2.825	4.8	2.825	1.375
Lygus pratensis	AMNH_PBI 00346900	female	1.15	0.475	1.5	2.4	1.275	2.75	5.2	0.55	0.975	6.1	0.95	1.1	2.375	2.85	4.7	2.75	1.25
Lygus pratensis	AMNH_PBI 00344992	male	1.1	0.4	1.55	2.075	1.1	2.625	5.1	0.5	0.875	6.2	0.8	0.975	2.325	2.4	5	2.625	1.3
Lygus pratensis	AMNH_PBI 00344994	female	1.15	0.45	1.5	2.225	1.15	2.65	4.8	0.525	0.925	5.8	0.925	1	2.3	2.8	4.3	2.55	1.15
Lygus pratensis	AMNH_PBI 00346931	female	1.1	0.425	1.2	2.075	1.075	2.525	4.7	0.55	0.9	5.7	0.85	0.95	2.225	2.425	4.4	2.45	1.175
Lygus pratensis	AMNH_PBI 00346930	male	1.125	0.4	1.75	2.125	1.05	2.85	4.9	0.6	0.9	5.9	0.925	1	2.275	2.425	4.6	2.6	1.25
Lygus pratensis	AMNH_PBI 00348291	male	1.1	0.375	1.55	2.075	0.95	2.575	4.9	0.55	0.875	6	0.9	0.975	2.25	2.6	3.8	2.625	1.325
Lygus pratensis	AMNH_PBI 00348295	female	1.1	0.45	1.35	2.2	1	2.55	4.7	0.5	0.9	5.6	0.925	1	2.225	2.575	4.4	2.5	1.175
Lygus pratensis	AMNH_PBI 00348766	female	1.125	0.45	1.625	2.225	1.1	2.65	4.7	0.5	0.925	5.6	0.85	1.025	2.25	2.55	4.3	2.5	1.1
Lygus pratensis	AMNH_PBI 00348773	male	1.1	0.4	1.7	2.025	1.075	2.525	4.6	0.6	0.85	5.7	0.9	0.95	2.225	2.4	4.4	2.525	1.2
Lygus pratensis	AMNH_PBI 00339760	female	1.125	0.425	1.65	2.125	1.125	2.675	4.7	0.55	0.9	5.7	0.875	1	2.2	2.55	4.4	2.525	1.15
Lygus pratensis	AMNH_PBI 00339761	male	1.1	0.4	1.575	2.05	1	2.7	4.9	0.55	0.875	6.1	0.925	1	2.35	2.6	4.8	2.625	1.25
Lygus pratensis	AMNH_PBI 00338590	female	1.15	0.5	1.5	2.375	1.3	2.775	5	0.6	0.925	6.2	0.925	1.05	2.425	2.8	4.9	2.625	1.25
Lygus pratensis	AMNH_PBI 00338592	male	1.125	0.4	1.6	2.05	1.05	2.6	5.1	0.55	0.875	6.4	0.85	0.975	2.3	2.55	5	2.525	1.3
Lygus pratensis	AMNH_PBI 00338509	female	1.2	0.5	1.525	2.45	1.275	2.8	5.2	0.5	0.9	6.1	0.95	1.15	2.5	2.85	4.4	2.625	1.225
Lygus pratensis	AMNH_PBI 00338515	male	1.2	0.425	1.675	2.375	1.175	2.65	5.2	0.5	0.925	6.4	0.875	1.05	2.325	2.8	5.1	2.675	1.3
Lygus pratensis	AMNH_PBI 00338657	male	1.1	0.4	1.625	2.225	1	2.725	4.9	0.525	0.875	6	0.9	1.025	2.375	2.625	4.9	2.7	1.35
Lygus pratensis	AMNH_PBI 00340035	male	1.125	0.4	1.75	1.975	1	2.65	4.5	0.575	0.875	5.4	0.85	0.9	2.2	2.5	4.1	2.4	1.125
Lygus pratensis	AMNH_PBI 00344803	female	1.125	0.475	1.5	2.175	1.075	2.575	4.6	0.5	0.925	5.6	0.9	1	2.225	2.525	4.2	2.425	1.1
Lygus pratensis	AMNH_PBI 00339745	female	1.125	0.425	1.575	2.075	1.075	2.6	4.5	0.5	0.875	5.3	0.875	0.975	2.25	2.425	4.1	2.3	1.075
Lygus gemellatus	AMNH_PBI 00346299	female	1.15	0.5	1.475	2.375	1.2	2.5	5	0.5	0.95	5.8	0.925	1.1	2.25	2.6	4.5	2.5	1.225
Lygus gemellatus	AMNH_PBI 00346125	male	1.075	0.45	1.525	2.125	1.025	2.5	4.5	0.5	0.85	5.3	0.95	1	2.175	2.55	4.1	2.35	1.125
Lygus gemellatus	AMNH_PBI 00344946	female	1.175	0.5	1.55	2.35	1.325	2.525	5	0.525	0.975	6	0.975	1.125	2.325	2.625	4.4	2.5	1.2
Lygus gemellatus	AMNH_PBI 00344941	male	1.15	0.475	1.725	2.25	1.15	2.75	5.2	0.575	0.975	6.3	0.925	1.05	2.375	2.75	4.8	2.55	1.3
Lygus gemellatus	AMNH_PBI 00346158	female	1.125	0.475	1.325	2.225	1.025	2.45	4.7	0.45	0.875	5.7	0.9	1.05	2.3	2.55	4.5	2.525	1.225
Lygus gemellatus	AMNH_PBI 00346146	male	1.175	0.425	1.4	2.05	1	2.3	4.4	0.475	0.85	5.3	0.875	0.95	2.175	2.5	4.3	2.35	1.175
Lygus gemellatus	AMNH_PBI 00344091	male	1.1	0.425	1.425	2.125	1.05	2.425	4.7	0.5	0.875	5.7	0.85	0.975	2.15	2.45	4.3	2.375	1.125
Lygus gemellatus	AMNH_PBI 00344100	female	1.15	0.5	1.475	2.25	1.275	2.575	4.8	0.525	0.975	5.7	0.875	1.025	2.325	2.6	4.3	2.5	1.15
Lygus gemellatus	AMNH_PBI 00348584	female	1.175	0.5	1.5	2.35	1.25	2.6	5.1	0.5	0.975	6.1	0.95	1.125	2.35	2.75	4.7	2.525	1.1
Lygus gemellatus	AMNH_PBI 00348571	male	1.1	0.45	1.45	2.1	1.025	2.475	4.7	0.525	0.9	5.8	0.825	0.975	2.225	2.525	4.4	2.45	1.225
Lygus gemellatus	AMNH_PBI 00344923	female	1.2	0.525	1.475	2.425	1.2	2.75	5.1	0.5	0.975	5.7	0.975	1.2	2.45	2.8	4.5	2.775	1.25
Lygus gemellatus	AMNH_PBI 00344928	male	1.15	0.475	1.6	2.275	1.225	2.625	5.2	0.525	0.975	6.3	0.95	1.1	2.45	2.75	4.8	2.625	1.325
Lygus gemellatus	AMNH_PBI 00350137	female	1.15	0.475	1.425	2.2	1.15	2.6	5	0.55	0.925	6.1	0.9	1.025	2.3	2.65	4.5	2.55	1.175
Lygus gemellatus	AMNH_PBI 00350140	male	1.125	0.475	1.6	2.3	1.125	2.725	5.4	0.55	0.925	6.3	0.925	1.075	2.425	2.6	4.7	2.65	1.325
Lygus gemellatus	AMNH_PBI 00344135	female	1.225	0.5	1.575	2.325	1.15	2.8	4.9	0.55	1	5.8	0.95	1.1	2.375	2.725	4.5	2.625	1.125
Lygus gemellatus	AMNH_PBI 00344138	male	1.2	0.45	1.6	2.275	1.15	2.775	4.9	0.575	0.95	5.7	0.95	1.075	2.35	2.575	4.2	2.55	1.125
Lygus gemellatus	AMNH_PBI 00348497	male	1.125	0.45	1.5	2.3	1.15	2.725	5.1	0.55	0.925	6.2	0.9	1.075	2.35	2.575	4.6	2.575	1.225
Lygus gemellatus	AMNH_PBI 00348501	female	1.15	0.5	1.5	2.375	1.275	2.625	5.3	0.525	0.95	6.4	0.9	1.15	2.4	2.75	4.6	2.6	1.225
Lygus gemellatus	AMNH_PBI 00343877	female	1.15	0.5	1.45	2.15	1.075	2.55	4.5	0.55	0.975	5.5	0.875	1	2.175	2.475	4	2.45	1.1
Lygus gemellatus	AMNH_PBI 00343884	male	1.125	0.475	1.45	2.2	1.15	2.525	4.7	0.525	0.925	5.5	0.875	1.05	2.2	2.5	4	2.5	1.15
Lygus gemellatus	AMNH_PBI 00343801	female	1.15	0.525	1.475	2.35	1.2	2.525	5.1	0.55	0.975	6	0.975	1.125	2.4	2.7	4.5	2.65	1.175
Lygus gemellatus	AMNH_PBI 00343807	male	1.125	0.45	1.55	2.225	1.075	2.625	4.8	0.525	0.925	5.6	0.975	1.075	2.375	2.55	4.2	2.575	1.15
Lygus gemellatus	AMNH_PBI 00345710	male	1.15	0.45	1.575	2.2	1.175	2.625	4.7	0.525	0.95	5.5	0.95	1.025	2.275	2.55	4.1	2.6	1.15
Lygus gemellatus	AMNH_PBI 00345711	female	1.25	0.525	1.525	2.525	1.275	2.675	5.2	0.575	1.025	6	1.025	1.25	2.525	3	4.5	2.775	1.175
Lygus gemellatus	AMNH_PBI 00344908	female	1.1375	0.475	1.575	2.325	1.1	2.6	4.9	0.525	0.95	5.7	1	1.075	2.4	2.675	4.4	2.625	1.15
Lygus gemellatus	AMNH_PBI 00348358	male	1.15	0.45	1.55	2.25	1.1	2.625	4.8	0.575	0.9	5.6	0.975	1.075	2.275	2.575	4.5	2.625	1.2
Lygus gemellatus	AMNH_PBI 00348457	female	1.175	0.525	1.5	2.4	1.25	2.725	5.2	0.55	1	6.1	1	1.1	2.35	2.725	4.6	2.65	1.225
Lygus gemellatus	AMNH_PBI 00348635	male	1.05	0.425	1.45	2	1	2.45	4.6	0.5	0.875	5.6	0.9	0.95	2.125	2.35	4.3	2.4	1.15
Lygus gemellatus	AMNH_PBI 00344128	male	1.1	0.45	1.425	2.05	1	2.475	4.7	0.525	0.9	5.5	0.875	1.025	2.275	2.5	4.1	2.5	1.1
Lygus gemellatus	AMNH_PBI 00344133	female	1.075	0.425	1.4	2.075	1.025	2.525	4.5	0.55	0.925	5.2	0.825	0.95	2.175	2.45	4	2.425	1.05
Lygus gemellatus	AMNH_PBI 00346647	male	1.075	0.425	1.475	2.125	1.075	2.575	4.8	0.525	0.9	5.8	0.975	1	2.375	2.525	4.6	2.625	1.225
Lygus gemellatus	AMNH_PBI 00346649	female	1.1	0.475	1.4	2.175	1.075	2.45	4.2	0.5	0.925	5.2	0.875	1	2.25	2.6	4.4	2.5	1.125
Lygus gemellatus	AMNH_PBI 00346362	female	1.15	0.5	1.65	2.4	1.15	2.725	5.1	0.625	1	6.2	0.925	1.175	2.475	2.875	4.6	2.675	1.175
Lygus gemellatus	AMNH_PBI 00346374	male	1.1	0.45	1.525	2.15	1.125	2.55	4.7	0.55	0.9	5.9	0.925	1.075	2.425	2.575	4.5	2.65	1.275
Lygus gemellatus	AMNH_PBI 00348427	female	1.125	0.5	1.425	2.175	1.15	2.525	4.8	0.5	0.975	5.7	0.85	1	2.275	2.6	4.4	2.5	1.175
Lygus gemellatus	AMNH_PBI 00348431	male	1.1	0.45	1.475	2.075	1.05	2.5	4.6	0.5	0.9	5.5	0.875	1.025	2.125	2.5	4.3	2.425	1.175
Lygus gemellatus	AMNH_PBI 00345761	male	1.15	0.45	1.5	2.175	1.15	2.625	4.9	0.525	0.95	5.7	0.925	1	2.35	2.575	4.3	2.575	1.225
Lygus gemellatus	AMNH_PBI 00345763	female	1.175	0.5	1.7	2.45	1.225	2.7	5.3	0.575	0.975	6.3	1	1.1	2.5	2.75	4.8	2.75	1.25
Lygus gemellatus	AMNH_PBI 00348702	female	1.125	0.5	1.35	2.2	1.175	2.45	4.8	0.525	0.95	5.8	0.875	1.025	2.175	2.55	4.4	2.5	1.1
Lygus gemellatus	AMNH_PBI 00348696	male	1.075	0.425	1.45	2.125	1.15	2.5	4.9	0.575	0.925	6	0.925	1.05	2.375	2.55	4.6	2.65	1.175
Lygus gemellatus	AMNH_PBI 00349053	male	1.075	0.425	1.5	2.125	1.05	2.55	4.7	0.55	0.9	5.4	0.925	1.025	2.275	2.5	4.1	2.55	1.2
Lygus gemellatus	AMNH_PBI 00349054	female	1.15	0.5	1.425	2.275	1.225	2.55	5	0.5	0.975	5.9	0.925	1.075	2.35	2.575	4.4	2.625	1.25
